# Supplementary material for: Predictive Model for High Coronary Artery Calcium Score in Young Patients with Non-Dialysis Chronic Kidney Disease
Source: J Pers Med. 2021 Dec 15;11(12):1372. doi: 10.3390/jpm11121372 (PMC8703324; doi:10.3390/jpm11121372)
Supplement: Supplementary file 1 [file jpm-11-01372-s001.zip › jpm-1507303-supplementary.pdf]

## Supplementary Materials

**Table S1.** Clinical characteristics of enrolled patients.

| Features                             | Training            | Validation          | <i>p</i> -value |
|--------------------------------------|---------------------|---------------------|-----------------|
| Age                                  | 46.5 ± 9.0          | 46.3 ± 9.6          | 0.732           |
| Sex                                  |                     |                     | 0.885           |
| Female                               | 399 (42.5%)         | 169 (41.9%)         |                 |
| Male                                 | 539 (57.5%)         | 234 (58.1%)         |                 |
| Estimated glomerular filtration rate | 55.6 (32.7;88.2)    | 54.5 (32.3;85.2)    | 0.947           |
| Serum albumin                        | 4.2 ± 0.4           | 4.2 ± 0.4           | 0.011           |
| Uric acid                            | 6.9 ± 2.0           | 7.0 ± 1.9           | 0.657           |
| C-reactive protein                   | 1.7 ± 3.9           | 2.0 ± 5.4           | 0.301           |
| Fasting blood glucose                | 106.7 ± 38.2        | 108.6 ± 43.7        | 0.457           |
| Smoking history                      |                     |                     | 0.557           |
| Current                              | 528 (56.3%)         | 218 (54.1%)         |                 |
| Never                                | 169 (18.0%)         | 70 (17.4%)          |                 |
| Ex                                   | 241 (25.7%)         | 115 (28.5%)         |                 |
| High density lipid                   | 48.0 (40.0;59.0)    | 49.0 (39.0;59.5)    | 0.837           |
| Low density lipid                    | 94.0 (75.0;117.0)   | 101.0 (80.0;122.0)  | 0.012           |
| Triglyceride                         | 127.0 (89.0;187.0)  | 133.0 (92.0;195.0)  | 0.209           |
| Total cholesterol                    | 172.0 (150.0;199.0) | 178.0 (155.0;203.0) | 0.032           |
| Educational status                   |                     |                     | 0.026           |
| Below elementary school              | 46 (4.9%)           | 32 (7.9%)           |                 |
| Middle school                        | 88 (9.4%)           | 23 (5.7%)           |                 |
| High school                          | 355 (37.8%)         | 149 (37.0%)         |                 |
| Above university                     | 449 (47.9%)         | 199 (49.4%)         |                 |
| Economic status                      |                     |                     | 0.843           |
| Low                                  | 251 (26.8%)         | 114 (28.3%)         |                 |
| Middle                               | 545 (58.1%)         | 230 (57.1%)         |                 |
| Hight                                | 142 (15.1%)         | 59 (14.6%)          |                 |
| Marital status                       |                     |                     | 0.353           |
| Married                              | 747 (79.6%)         | 334 (82.9%)         |                 |
| Unmarried                            | 149 (15.9%)         | 52 (12.9%)          |                 |
| Divorced or widowed                  | 42 ( 4.5%)          | 17 ( 4.2%)          |                 |
| Work status                          |                     |                     | 0.847           |
| Employed                             | 656 (69.9%)         | 279 (69.2%)         |                 |
| Unemployed                           | 282 (30.1%)         | 124 (30.8%)         |                 |
| Use of statin                        |                     |                     | 0.415           |
| Yes                                  | 434 (46.3%)         | 176 (43.7%)         |                 |
| No                                   | 504 (53.7%)         | 227 (56.3%)         |                 |
| Use of ezemitide                     |                     |                     | 0.617           |
| Yes                                  | 62 (6.6%)           | 23 (5.7%)           |                 |
| No                                   | 876 (93.4%)         | 380 (94.3%)         |                 |
| White blood cell                     | 6559.8 ± 2006.6     | 6557.3 ± 1920.5     | 0.983           |
| Calcium                              | 9.1 ± 0.5           | 9.2 ± 0.5           | 0.007           |
| Phosphate                            | 3.6 ± 0.7           | 3.7 ± 0.7           | 0.042           |
| Serum ferritin                       | 98.0 (51.2;177.5)   | 97.2 (47.6;169.5)   | 0.655           |
| Use of ACE inhibitor                 |                     |                     | 0.249           |
| Yes                                  | 128 (13.6%)         | 45 (11.2%)          |                 |
| No                                   | 810 (86.4%)         | 358 (88.8%)         |                 |
| Use of ARB                           |                     |                     | 0.971           |
| Yes                                  | 747 (79.6%)         | 322 (79.9%)         |                 |
| No                                   | 191 (20.4%)         | 81 (20.1%)          |                 |

|                                    |                  |                  |       |
|------------------------------------|------------------|------------------|-------|
| Mean ankle to brachial index       | 1.1 ± 0.1        | 1.1 ± 0.1        | 0.878 |
| Body mass index                    | 24.4 ± 3.6       | 24.3 ± 3.5       | 0.667 |
| Systolic blood pressure            | 126.5 ± 16.0     | 126.6 ± 15.4     | 0.953 |
| Diastolic blood pressure           | 78.4 ± 10.7      | 78.0 ± 10.9      | 0.606 |
| Waist hip ratio                    | 0.9 ± 0.1        | 0.9 ± 0.1        | 0.7   |
| Hemoglobin                         | 13.0 ± 2.0       | 13.1 ± 2.0       | 0.359 |
| Urine protein to creatinine ratio  | 1.3 ± 2.2        | 1.1 ± 1.7        | 0.277 |
| Alkaline phosphatase               | 67.0 (52.0;89.0) | 65.0 (51.0;90.0) | 0.666 |
| Serum sodium                       | 140.8 ± 2.4      | 140.7 ± 2.5      | 0.504 |
| Serum chloride                     | 105.4 ± 3.6      | 105.2 ± 3.5      | 0.303 |
| Serum potassium                    | 4.6 ± 0.5        | 4.6 ± 0.6        | 0.899 |
| High coronary artery calcium score |                  |                  | 1     |
| No                                 | 593 (63.2%)      | 255 (63.3%)      |       |
| Yes                                | 345 (36.8%)      | 148 (36.7%)      |       |
